# Supplementary material for: A green ionic liquid solvent for additive-free, efficient and stable bladed perovskite solar cells under ambient conditions
Source: Royal Society of Chemistry journal article supplement (doi:10.1039/d4nj01972e), 2024-01-01
Supplement: d4nj01972e1.pdf [file d4nj01972e1.pdf]

## Supporting Information

### **A Green Ionic Liquid Solvent for Additive-free, Efficient and Stable Bladed Perovskite Solar Cells in Ambient Condition**

Huanqin Yu<sup>a,\*</sup>, Bingqiang Cao<sup>b,\*</sup>

<sup>a</sup> *Department of Traffic Management Engineering, Shandong Police College, Jinan 250014, China*

<sup>b</sup> *School of Material Science and Engineering, Materials Research Center for Energy and Photoelectrochemical Conversion, University of Jinan, Jinan 250022, Shandong, China*

\*To whom all correspondence should be addressed: Yuhq2022@sdpc.edu.cn

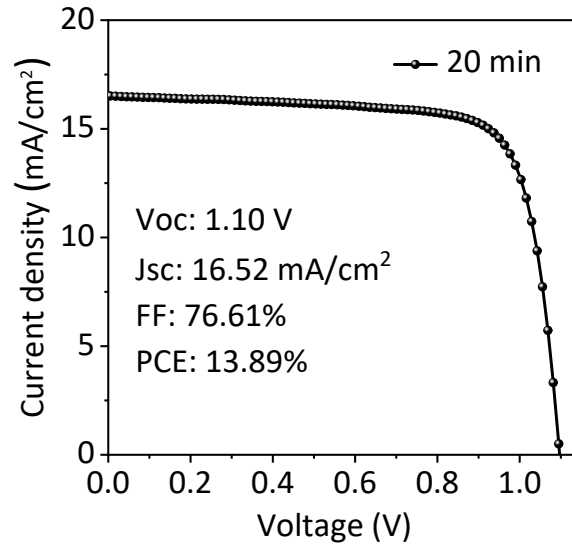

**Figure S1.** *J-V* curves of device annealed for 20 min

**Table S1** Summary of precursor solutions, preparation environments, additives, PCE and stability of bladed perovskite films in this work and previously reported

| Precursors                | Solvents         | Environment         | Additives                 | PCE            | Stability      | Ref         |
|---------------------------|------------------|---------------------|---------------------------|----------------|----------------|-------------|
| MAPbI <sub>3</sub> -based | DMF              | N <sub>2</sub>      | Without PAA               | 10.3%          | 40% (576 hrs)  | 1           |
|                           |                  |                     | With PAA                  | 14.9%          | 80% (576 hrs)  |             |
| FAMACs-based              | GBL/DMSO/IPA     | N <sub>2</sub>      | Without 18C6              | 7.8%           | /              | 2           |
|                           |                  |                     | With 18C6                 | 14.7%          | /              |             |
| MAPbI <sub>3</sub> -based | DMF/DMSO         | Ambient environment | normal MAI                | 8.28%          | /              | 3           |
|                           |                  |                     | With excess MAI           | 10.92 %        | /              |             |
| MAPbI <sub>3</sub> -based | 2-methoxyethanol | Dry air             | Without PbCl <sub>2</sub> | 6.69%          | /              | 4           |
|                           |                  |                     | With PbCl <sub>2</sub>    | 14.3%          | /              |             |
| MAPbI <sub>3</sub> -based | DMF/IPA          | Ambient environment | Without additives         | 11.1%          | 90% (336 hrs)  | 5           |
| <b>MAPbI<sub>3</sub></b>  | <b>MAAc</b>      | <b>Ambient</b>      | <b>Without</b>            | <b>&gt;14%</b> | <b>&gt;80%</b> | <b>This</b> |

|  |  |  |                  |  |                   |             |
|--|--|--|------------------|--|-------------------|-------------|
|  |  |  | <b>additives</b> |  | <b>(1200 hrs)</b> | <b>work</b> |
|--|--|--|------------------|--|-------------------|-------------|

## Reference

- [1] N. Li, F. Xu, Z. Qiu, J. Liu, X. Wan, X. Zhu, H. Yu, C. Li, Y. Liu, B. Cao, Sealing the domain boundaries and defects passivation by Poly(acrylic acid) for scalable blading of efficient perovskite solar cells, *Journal of Power Sources*, 426 (2019) 188-196. 10.1016/j.jpowsour.2019.04.041.
- [2] K-W. Huang, M-H. Li, P-T. Hsieh, C-F. Lin, R. Rajendran, Y-L. Tung, P. Chen, Role of crown ether in the perovskite precursor for doctor-bladed perovskite solar cells: investigation by liquid-phase scanning electron microscopy, *Journal of Materials Chemistry C.*, 10 (2022) 16016-16027. <https://doi.org/10.1039/D2TC02351B>
- [3] Y. Peng, Y. Cheng, C. Wang, C. Zhang, H. Xia, K. Huang, S. Tong, X. Hao, J. Yang, Fully doctor-bladed planar heterojunction perovskite solar cells under ambient condition, *Organic Electronics*, 58 (2018) 153-158. <https://doi.org/10.1016/j.orgel.2018.04.020>.
- [4] A. Marques, R. Faria, J. Freitas, A. Nogueira, Low-Temperature Blade-Coated Perovskite Solar Cells, *Industrial & Engineering Chemistry Research*, 60 (2021) 7145-7154. <https://doi.org/10.1021/acs.iecr.1c00789>
- [5] Q. Wang, M. Eslamian, T. Zhao, A. Jen, Achieving Fully Blade-Coated Ambient-Processed Perovskite Solar Cells by Controlling the Blade-Coater Temperature, *IEEE Journal of Photovoltaics*, 8 (2018) 1662-1669. 10.1109/JPHOTOV.2018.2861752.
